# Supplementary material for: Nitrogen isotopic composition of plants and soil in an arid mountainous terrain: south slope versus north slope
Source: Copernicus journal article supplement (doi:10.5194/bg-15-369-2018), 2018-01-17
Supplement: Supplementary file 1 [file bg-15-369-2018-supplement.zip]

Archive with 2 entries (2 files):
- bg-15-369-2018-supplement-title-page.pdf
- data.xlsx
