# Supplementary material for: Nitrogen isotopic composition of plants and soil in an arid mountainous terrain: south slope versus north slope
Source: Copernicus journal article supplement (doi:10.5194/bg-15-369-2018), 2018-01-17
Supplement: Supplementary file 1 [file bg-15-369-2018-supplement.zip › bg-15-369-2018-supplement-title-page.pdf]

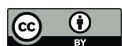

## *Supplement of*

# **Nitrogen isotopic composition of plants and soil in an arid mountainous terrain: south slope versus north slope**

**Chongjuan Chen et al.**

*Correspondence to:* Guoan Wang (gawang@cau.edu.cn)

- [bg-15-369-2018-supplement-title-page.pdf](#)
- [data.xlsx](#)

The copyright of individual parts of the supplement might differ from the CC BY 4.0 License.
