# Supplementary material for: Nitrogen isotopic composition of plants and soil in an arid mountainous terrain: south slope versus north slope
Source: Copernicus journal article supplement (doi:10.5194/bg-15-369-2018), 2018-01-17
Supplement: Supplementary file 1 [file bg-15-369-2018-supplement.zip › data.xlsx]

## Sheet: north slope
altitude (m)	latitude	longitude	MAT (℃)	MAP (mm)	species	life forms	leaf δ15N (‰)	leaf N (mg/g)	leaf C/N (ln transformed)	soil δ15N (‰)	△δ15N leaf-soil (‰)	soil bulk density (g/cm3)	soil moisture	soil pH	soil N (mg/g)	silt/clay ratio
1564	43.5344	87.3195	3.9	314.7	Achnatherum splendens	herb	4.067	15.0425	3.27923	-0.811	4.878	1.5097	0.04372	7.98333	1.182	8.76404
1564	43.5344	87.3195	3.9	314.7	Rosaceae rugosa	woody plant	-0.092	12.8849	3.44973	-4.97	4.878	1.5097	0.04372	7.98333	1.182	8.76404
1564	43.5344	87.3195	3.9	314.7	Rosaceae	woody plant	1.095	15.907	3.34216	-3.783	4.878	1.5097	0.04372	7.98333	1.182	8.76404
1727	43.49	87.2804	3.1	326.2	Carex spp.	herb	0.232	11.2858	3.6459	-3.249	3.481	1.2872	0.04762	8.34333	1.3337	5.63781
2200	43.4529	87.2249	0.9	359.4	Apocynum venetum	herb	1.897	27.0565	2.70379	-1.644	3.541	0.7731	0.75889	6.62	6.8844	14.1014
2200	43.4529	87.2249	0.9	359.4	Polygonum viviparum	herb	2.147	12.9277	3.37002	-1.394	3.541	0.7731	0.75889	6.62	6.8844	14.1014
2200	43.4529	87.2249	0.9	359.4	Nepeta cataria	herb	3.202	23.299	2.73969	-0.339	3.541	0.7731	0.75889	6.62	6.8844	14.1014
2200	43.4529	87.2249	0.9	359.4	Thalictrum sp.	herb	2.11	38.0458	2.34971	-1.431	3.541	0.7731	0.75889	6.62	6.8844	14.1014
2200	43.4529	87.2249	0.9	359.4	Glaucium squamigerum	herb	2.865	28.0339	2.62253	-0.676	3.541	0.7731	0.75889	6.62	6.8844	14.1014
2200	43.4529	87.2249	0.9	359.4	Poa annua	herb	0.202	15.3586	3.22103	-3.339	3.541	0.7731	0.75889	6.62	6.8844	14.1014
2200	43.4529	87.2249	0.9	359.4	Nepeta cataria	herb	4.277	22.6304	2.8131	0.736	3.541	0.7731	0.75889	6.62	6.8844	14.1014
2200	43.4529	87.2249	0.9	359.4	Spiraea salicifolia	woody plant	4.278	25.834	2.53491	0.737	3.541	0.7731	0.75889	6.62	6.8844	14.1014
2200	43.4529	87.2249	0.9	359.4	Adina rubella	woody plant	1.474	12.6275	3.45834	-2.067	3.541	0.7731	0.75889	6.62	6.8844	14.1014
2300	43.4029	87.2449	0.5	366.4	Polygonum viviparum	herb	-0.11	20.7397	3.00014	-4.161	4.051	0.3457	0.41509	6.53667	14.8032	16.7504
2300	43.4029	87.2449	0.5	366.4	Roegneria kamoji	herb	5.076	22.7174	2.82425	1.025	4.051	0.3457	0.41509	6.53667	14.8032	16.7504
2300	43.4029	87.2449	0.5	366.4	Artemisia rupestris	herb		27.1094	2.54053		4.051	0.3457	0.41509	6.53667	14.8032	16.7504
2300	43.4029	87.2449	0.5	366.4	Elymus dahuricus	herb	-0.053	15.8266	3.30324	-4.104	4.051	0.3457	0.41509	6.53667	14.8032	16.7504
2300	43.4029	87.2449	0.5	366.4	Poa annua	herb		16.5007	3.16282		4.051	0.3457	0.41509	6.53667	14.8032	16.7504
2300	43.4029	87.2449	0.5	366.4	Thalictrum sp.	herb	-1.124	24.2907	2.85523	-5.175	4.051	0.3457	0.41509	6.53667	14.8032	16.7504
2300	43.4029	87.2449	0.5	366.4	Thalictrum sp.	herb	-0.552	27.6082	2.6898	-4.603	4.051	0.3457	0.41509	6.53667	14.8032	16.7504
2300	43.4029	87.2449	0.5	366.4	Sorbus tianschanica	woody plant	0.827	39.3383	2.37014	-3.224	4.051	0.3457	0.41509	6.53667	14.8032	16.7504
2300	43.4029	87.2449	0.5	366.4	Sorbus tianschanica	woody plant	0.734	40.025	2.40567	-3.317	4.051	0.3457	0.41509	6.53667	14.8032	16.7504
2300	43.4029	87.2449	0.5	366.4	Lonicera maackii	woody plant	0.476	27.9749	2.81802	-3.575	4.051	0.3457	0.41509	6.53667	14.8032	16.7504
2300	43.4029	87.2449	0.5	366.4	Potentilla fruticosa	woody plant	-1.957	20.8619	3.04146	-6.008	4.051	0.3457	0.41509	6.53667	14.8032	16.7504
2380	43.3425	87.1587	-0.1	372	Potentilla chinensis	herb	5.466	33.8549	2.40744	2.259	3.207	1.1817	0.21181	7.97667	4.059	9.75517
2380	43.3425	87.1587	-0.1	372	Elymus dahuricus	herb	3.028	17.1946	3.07344	-0.179	3.207	1.1817	0.21181	7.97667	4.059	9.75517
2380	43.3425	87.1587	-0.1	372	Arctium sp.	herb	2.706	37.1272	2.31107	-0.501	3.207	1.1817	0.21181	7.97667	4.059	9.75517
2380	43.3425	87.1587	-0.1	372	Chenopodiaceae	herb	7.188	31.2545	2.37924	3.981	3.207	1.1817	0.21181	7.97667	4.059	9.75517
2380	43.3425	87.1587	-0.1	372	Lamium barbatum	woody plant	2.992	36.8905	2.39219	-0.215	3.207	1.1817	0.21181	7.97667	4.059	9.75517
2380	43.3425	87.1587	-0.1	372	Spiraea salicifolia	woody plant	0.414	41.388	2.32071	-2.793	3.207	1.1817	0.21181	7.97667	4.059	9.75517
2530	43.2824	87.1237	-0.6	382.6	Potentilla fruticosa	woody plant	1.235	25.6348	2.84615	-1.917	3.152	1.1188	0.181	6.99	2.4557	10.4519
2630	43.253	87.1275	-1	389.6	Kobresia humilis	herb	1.532	13.8155	3.47329	-0.902	2.434	0.8202	0.37174	7.28	4.4039	9.5046
2630	43.253	87.1275	-1	389.6	Poa annua	herb	0.252	11.1696	3.56358	-2.182	2.434	0.8202	0.37174	7.28	4.4039	9.5046
2630	43.253	87.1275	-1	389.6	Potentilla fruticosa	woody plant	0.326	21.1466	2.99038	-2.108	2.434	0.8202	0.37174	7.28	4.4039	9.5046
2730	43.2032	87.1282	-1.5	396.6	Geranium wilfordii	herb	-0.405	22.1222	2.77393	-5.23	4.825	0.5126	0.88002	6.64333	14.5803	17.9562
2730	43.2032	87.1282	-1.5	396.6	Thermopsis lanceolata	herb	-0.856	38.1619	2.40557	-5.681	4.825	0.5126	0.88002	6.64333	14.5803	17.9562
2730	43.2032	87.1282	-1.5	396.6	Apocynum venetum	herb	-0.553	25.9048	2.72167	-5.378	4.825	0.5126	0.88002	6.64333	14.5803	17.9562
2730	43.2032	87.1282	-1.5	396.6	Kobresia humilis	herb	-1.402	14.3329	3.2954	-6.227	4.825	0.5126	0.88002	6.64333	14.5803	17.9562
2730	43.2032	87.1282	-1.5	396.6	Potentilla fruticosa	woody plant	-1.866	12.1966	3.61969	-6.691	4.825	0.5126	0.88002	6.64333	14.5803	17.9562
2830	43.1976	87.1299	-2	403.6	Polygonum	herb	6.775	20.5732	3.04641	2.447	4.328	0.4332	1.12061	5.975	15.954	20.4204
2830	43.1976	87.1299	-2	403.6	Echinochloa crusgalli	herb	0.334	10.3078	3.63227	-3.994	4.328	0.4332	1.12061	5.975	15.954	20.4204
2830	43.1976	87.1299	-2	403.6	Agropyron cristatum	herb	-0.485	14.6579	3.35701	-4.813	4.328	0.4332	1.12061	5.975	15.954	20.4204
2830	43.1976	87.1299	-2	403.6	Apocynum venetum	herb	-1.785	19.6549	3.05143	-6.113	4.328	0.4332	1.12061	5.975	15.954	20.4204
2830	43.1976	87.1299	-2	403.6	Clematis sp.	herb	-2.02	14.5771	3.26155	-6.348	4.328	0.4332	1.12061	5.975	15.954	20.4204
2830	43.1976	87.1299	-2	403.6	Elymus dahuricus	herb	-4.798	10.2211	3.67883	-9.126	4.328	0.4332	1.12061	5.975	15.954	20.4204
2830	43.1976	87.1299	-2	403.6	Potentilla fruticosa	woody plant	-1.161	23.6445	2.87154	-5.489	4.328	0.4332	1.12061	5.975	15.954	20.4204
2930	43.1544	87.1315	-2.4	410.6	Thermopsis lanceolata	herb	-0.141	41.6213	2.34054	-0.365	0.224	0.8326	0.66479	6.87	3.5842	25.8803
2930	43.1544	87.1315	-2.4	410.6	Carex spp.	herb	-0.604	10.5908	3.67911	-0.828	0.224	0.8326	0.66479	6.87	3.5842	25.8803
2930	43.1544	87.1315	-2.4	410.6	Geranium wilfordii	herb	0.887	14.9404	3.26989	0.663	0.224	0.8326	0.66479	6.87	3.5842	25.8803
2930	43.1544	87.1315	-2.4	410.6	Polygonum	herb	6.213	25.5562	2.76608	5.989	0.224	0.8326	0.66479	6.87	3.5842	25.8803
2930	43.1544	87.1315	-2.4	410.6	Carex enervis	herb	-1.334	9.9919	3.683	-1.558	0.224	0.8326	0.66479	6.87	3.5842	25.8803
2930	43.1544	87.1315	-2.4	410.6	Ceratoides latens	woody plant	-2.144	14.3101	3.41197	-2.368	0.224	0.8326	0.66479	6.87	3.5842	25.8803
3030	43.1465	87.1032	-2.9	417.7	Carex enervis	herb	-0.022	14.1108	3.33441	-5.329	5.307	1.0785	0.44404	6.92	2.9698	20.1416
3030	43.1465	87.1032	-2.9	417.7	Kobresia humilis	herb	-2.396	5.7479	4.27725	-7.703	5.307	1.0785	0.44404	6.92	2.9698	20.1416
3130	43.1345	87.1348	-3.4	424.7	Kobresia humilis	herb	-0.837	13.7166	3.32466	-3.915	3.078	0.9563	0.78776	6.74721	0.2909	21.0555
3130	43.1345	87.1348	-3.4	424.7	Ceratoides latens	woody plant	-0.079	8.5136	3.57989	-3.157	3.078	0.9563	0.78776	6.74721	0.2909	21.0555
3230	43.1255	87.0062	-3.8	431.7	Kobresia humilis	herb	-0.971	10.4107	3.60423	-5.646	4.675	1.148	0.83266	6.80961	2.4951	16.9691
3230	43.1255	87.0062	-3.8	431.7	Cyperus sp.	herb	-1.774	11.76	3.51209	-6.449	4.675	1.148	0.83266	6.80961	2.4951	16.9691
3230	43.1255	87.0062	-3.8	431.7	Rhodiola rosea	herb	-3.989	6.7472	4.08587	-8.664	4.675	1.148	0.83266	6.80961	2.4951	16.9691
3230	43.1255	87.0062	-3.8	431.7	Thermopsis lupinoides	herb	-2.702	13.2041	3.40843	-7.377	4.675	1.148	0.83266	6.80961	2.4951	16.9691
3230	43.1255	87.0062	-3.8	431.7	Clematis sp.	herb	-3.565	8.5451	3.8023	-8.24	4.675	1.148	0.83266	6.80961	2.4951	16.9691
3230	43.1255	87.0062	-3.8	431.7	Anaphalis lactea	herb	-1.378	12.3604	3.4596	-6.053	4.675	1.148	0.83266	6.80961	2.4951	16.9691
3370	43.1199	86.8851	-4.5	442.5	Artemisia sp.	herb	-0.067	13.5508	3.35705	-6.165	6.098	0.5314	0.91532	6.93333	9.3358	16.3711
3370	43.1199	86.8851	-4.5	442.5	Carex spp.	herb	2.37	19.8136	2.99637	-3.728	6.098	0.5314	0.91532	6.93333	9.3358	16.3711
3370	43.1199	86.8851	-4.5	442.5	unknown	herb	2.884	24.6374	2.73581	-3.214	6.098	0.5314	0.91532	6.93333	9.3358	16.3711
3370	43.1199	86.8851	-4.5	442.5	unknown	herb	2.703	18.7465	2.81031	-3.395	6.098	0.5314	0.91532	6.93333	9.3358	16.3711
3370	43.1199	86.8851	-4.5	442.5	Carex spp.	herb	1.489	16.1549	3.00172	-4.609	6.098	0.5314	0.91532	6.93333	9.3358	16.3711
3540	43.1148	86.8435	-5.2	453.4	Cyperus sp.	herb	-1.709	25.7203	2.75288	-7.879	6.17	0.856	0.97185	7.05333	5.9121	11.0713
3540	43.1148	86.8435	-5.2	453.4	Androsace sp.	herb	4.388	19.7221	2.54039	-1.782	6.17	0.856	0.97185	7.05333	5.9121	11.0713
3540	43.1148	86.8435	-5.2	453.4	unknown	herb	0.86	18.7875	3.10884	-5.31	6.17	0.856	0.97185	7.05333	5.9121	11.0713
3540	43.1148	86.8435	-5.2	453.4	Anaphalis lactea	herb	0.861	15.4854	3.17701	-5.309	6.17	0.856	0.97185	7.05333	5.9121	11.0713
3710	43.1166	86.8322	-6	465.4	unknown	herb	0.199	23.2438	2.87418	-5.835	6.034	1.3848	1.04818	7.22	1.7233	14.9819
3710	43.1166	86.8322	-6	465.4	Leontopodium japonicum	herb	0.522	17.378	2.90763	-5.512	6.034	1.3848	1.04818	7.22	1.7233	14.9819
3710	43.1166	86.8322	-6	465.4	Cyperus sp.	herb	-0.925	18.2629	2.98492	-6.959	6.034	1.3848	1.04818	7.22	1.7233	14.9819
3710	43.1166	86.8322	-6	465.4	unknown	herb	0.249	25.1627	2.70588	-5.785	6.034	1.3848	1.04818	7.22	1.7233	14.9819
3710	43.1166	86.8322	-6	465.4	Umbelliferae	herb	1.212	27.6579	2.40924	-4.822	6.034	1.3848	1.04818	7.22	1.7233	14.9819
3710	43.1166	86.8322	-6	465.4	Caragana sp.	woody plant	-1.511	10.9434	3.45083	-7.545	6.034	1.3848	1.04818	7.22	1.7233	14.9819
3800	43.118	86.8205	-6.4	471.7	Oxytropis sp.	herb	-0.602	12.4683	3.3424	-5.216	4.614	2.5973	1.08859	8.07333	3.3873	9.51812
3800	43.118	86.8205	-6.4	471.7	unknown	herb	3.877	25.0896	2.74457	-0.737	4.614	2.5973	1.08859	8.07333	3.3873	9.51812
3800	43.118	86.8205	-6.4	471.7	Leontopodium japonicum	herb	0.249	14.6349	2.89648	-4.365	4.614	2.5973	1.08859	8.07333	3.3873	9.51812
3800	43.118	86.8205	-6.4	471.7	Androsace sp.	herb	1.755	6.4841	3.74126	-2.859	4.614	2.5973	1.08859	8.07333	3.3873	9.51812
3800	43.118	86.8205	-6.4	471.7	Artemisia sp.	herb	-1.396	33.6145	2.53117	-6.01	4.614	2.5973	1.08859	8.07333	3.3873	9.51812
3800	43.118	86.8205	-6.4	471.7	Carex spp.	herb	-0.668	24.6374	2.77183	-5.282	4.614	2.5973	1.08859	8.07333	3.3873	9.51812
3800	43.118	86.8205	-6.4	471.7	unknown	herb	0.867	29.3194	2.60016	-3.747	4.614	2.5973	1.08859	8.07333	3.3873	9.51812
3800	43.118	86.8205	-6.4	471.7	Lagochilus hirtus	herb	1.416	30.1459	2.16563	-3.198	4.614	2.5973	1.08859	8.07333	3.3873	9.51812
3800	43.118	86.8205	-6.4	471.7	unknown	herb	-2.085	41.2535	2.27289	-6.699	4.614	2.5973	1.08859	8.07333	3.3873	9.51812
3800	43.118	86.8205	-6.4	471.7	Leontopodium japonicum	herb	0.035	13.2783	3.06877	-4.579	4.614	2.5973	1.08859	8.07333	3.3873	9.51812
3800	43.118	86.8205	-6.4	471.7	Dendranthema sp.	herb	-1.629	13.7618	2.89892	-6.243	4.614	2.5973	1.08859	8.07333	3.3873	9.51812
3800	43.118	86.8205	-6.4	471.7	Saxifraga sp.	herb	-0.634	19.2088	2.652	-5.248	4.614	2.5973	1.08859	8.07333	3.3873	9.51812
3800	43.118	86.8205	-6.4	471.7	Oxytropis sp.	woody plant	-0.602	12.4683	3.3424	-5.216	4.614	2.5973	1.08859	8.07333	3.3873	9.51812

## Sheet: south slope
altitude (m)	latitude	longitude	MAT(℃)	MAP(mm)	species	life forms	leaf δ15N (‰)	leaf N (mg/g)	leaf C/N (ln transformed)	soil δ15N (‰)	△δ15N leaf-soil (‰)	soil bulk density(g/cm3)	soil moisture	soil pH	soil N (mg/g)	silt/clay ratio
1300	42.429	86.2317	9.2298	124	Suaeda glauca	herb	4.86	33.5	2.38047	7.11	-2.25	1.39	0.0063	7.92	0.36864	17.4
1300	42.429	86.2317	9.2298	124	Sarcozygium xanthoxylon	woody plant	4.6	18.7	2.70872	7.11	-2.51	1.39	0.0063	7.92	0.36864	17.4
1300	42.429	86.2317	9.2298	124	Haloxylon ammodendron	woody plant	-0.56	15.5	3.26079	7.11	-7.67	1.39	0.0063	7.92	0.36864	17.4
1300	42.429	86.2317	9.2298	124	Calligonum sp.	woody plant	4.63	13.6	3.37383	7.11	-2.48	1.39	0.0063	7.92	0.36864	17.4
1300	42.429	86.2317	9.2298	124	unknown	woody plant	1.81	12.9	3.33006	7.11	-5.3	1.39	0.0063	7.92	0.36864	17.4
1550	42.626	86.2622	7.7298	167	Festuca sp.	herb	4.75	16.9	3.22645	13.4	-8.65	1.43	0.0786	7.66	0.771067	18.0739
1820	42.7808	86.3228	6.1098	203	Stipa grandis	herb	0.58	12.4	3.18759	2.37	-1.79	1.46	0.0322	8.14	0.888009	13.8917
1820	42.7808	86.3228	6.1098	203	Suaeda glauca	herb	4.13	14.9	2.74084	2.37	1.76	1.46	0.0322	8.14	0.888009	13.8917
1820	42.7808	86.3228	6.1098	203	Suaeda glauca	herb	3.53	17.2	2.64048	2.37	1.16	1.46	0.0322	8.14	0.888009	13.8917
1820	42.7808	86.3228	6.1098	203	Achnatherum splendens	herb	-5.23	16	3.24181	2.37	-7.6	1.46	0.0322	8.14	0.888009	13.8917
1820	42.7808	86.3228	6.1098	203	Artemisia sp.	herb	2.51	16.2	3.14888	2.37	0.14	1.46	0.0322	8.14	0.888009	13.8917
1820	42.7808	86.3228	6.1098	203	Elaeagnus angustifolia	woody plant	0.03	17	3.1394	2.37	-2.34	1.46	0.0322	8.14	0.888009	13.8917
1820	42.7808	86.3228	6.1098	203	Nitraria tangutorum	woody plant	3.39	31.9	2.3665	2.37	1.02	1.46	0.0322	8.14	0.888009	13.8917
1820	42.7808	86.3228	6.1098	203	Caragana sinica	woody plant	1.47	30.4	2.65113	2.37	-0.9	1.46	0.0322	8.14	0.888009	13.8917
1950	42.8307	86.3573	5.3298	209	Achnatherum splendens	herb	3.65	20.8	2.99723	2.37	1.28	1.78	0.0284	8.03	1.05332	15.1083
1950	42.8307	86.3573	5.3298	209	Cleistogenes caespitosa	herb	2.93	14.3	3.24103	2.37	0.56	1.78	0.0284	8.03	1.05332	15.1083
1950	42.8307	86.3573	5.3298	209	Artemisia scoparia	herb	3.38	17	3.16463	2.37	1.01	1.78	0.0284	8.03	1.05332	15.1083
1950	42.8307	86.3573	5.3298	209	Geranium wilfordii	herb	5.17	24.4	2.72654	2.37	2.8	1.78	0.0284	8.03	1.05332	15.1083
1950	42.8307	86.3573	5.3298	209	Vicia sp.	herb	0.3	34.8	2.45014	2.37	-2.07	1.78	0.0284	8.03	1.05332	15.1083
1950	42.8307	86.3573	5.3298	209	Kalidium foliatum	woody plant	6.34	27.3	2.45959	2.37	3.97	1.78	0.0284	8.03	1.05332	15.1083
1950	42.8307	86.3573	5.3298	209	unknown	woody plant	1.44	13.8	3.37963	2.37	-0.93	1.78	0.0284	8.03	1.05332	15.1083
1950	42.8307	86.3573	5.3298	209	Elaeagnus angustifolia	woody plant	4.56	23.2	2.86676	2.37	2.19	1.78	0.0284	8.03	1.05332	15.1083
1950	42.8307	86.3573	5.3298	209	unknown	woody plant	2.21	17.6	3.1407	2.37	-0.16	1.78	0.0284	8.03	1.05332	15.1083
1950	42.8307	86.3573	5.3298	209	Caragana sinica	woody plant	1.38	33.8	2.57032	2.37	-0.99	1.78	0.0284	8.03	1.05332	15.1083
2080	42.8815	86.3788	4.5498	220	Suaeda glauca	herb	6.87	25.7	2.61958	5.23	1.64	1.35	0.0311	8.3	1.29577	13.6558
2080	42.8815	86.3788	4.5498	220	Arnebia guttata	herb	4.96	26.6	2.69192	5.23	-0.27	1.35	0.0311	8.3	1.29577	13.6558
2080	42.8815	86.3788	4.5498	220	Elaeagnus angustifolia	woody plant	5.48	21.2	2.82435	5.23	0.25	1.35	0.0311	8.3	1.29577	13.6558
2080	42.8815	86.3788	4.5498	220	Achnatherum splendens	woody plant	2.8	16.7	3.16082	5.23	-2.43	1.35	0.0311	8.3	1.29577	13.6558
2080	42.8815	86.3788	4.5498	220	Caragana sinica	woody plant	1.58	30.3	2.64971	5.23	-3.65	1.35	0.0311	8.3	1.29577	13.6558
2080	42.8815	86.3788	4.5498	220	Ephedra sinica	woody plant	4.73	17.1	3.21366	5.23	-0.5	1.35	0.0311	8.3	1.29577	13.6558
2230	42.9031	86.4948	3.6498	228	Dracocephalum sp.	herb	3.28	21.3	2.90252	5	-1.72	1.39	0.0582	8	3.37262	10.7586
2230	42.9031	86.4948	3.6498	228	Artemisia frigida	herb	1.06	19.4	3.06805	5	-3.94	1.39	0.0582	8	3.37262	10.7586
2230	42.9031	86.4948	3.6498	228	Youngia tenuifolia	herb	1.76	24.8	2.82731	5	-3.24	1.39	0.0582	8	3.37262	10.7586
2230	42.9031	86.4948	3.6498	228	Achnatherum splendens	herb	3.23	16.9	3.15615	5	-1.77	1.39	0.0582	8	3.37262	10.7586
2230	42.9031	86.4948	3.6498	228	Stipa grandis	herb	0.2	11.9	3.54904	5	-4.8	1.39	0.0582	8	3.37262	10.7586
2230	42.9031	86.4948	3.6498	228	unknown	herb	-0.69	14.2	3.39047	5	-5.69	1.39	0.0582	8	3.37262	10.7586
2230	42.9031	86.4948	3.6498	228	Caragana sinica	herb	-1.66	28.2	2.75811	5	-6.66	1.39	0.0582	8	3.37262	10.7586
2230	42.9031	86.4948	3.6498	228	Stipa grandis	herb	0.02	9.5	3.80822	5	-4.98	1.39	0.0582	8	3.37262	10.7586
2230	42.9031	86.4948	3.6498	228	Leymus secalinus	herb	0.58	14.1	3.34215	5	-4.42	1.39	0.0582	8	3.37262	10.7586
2230	42.9031	86.4948	3.6498	228	Suaeda glauca	herb	5.49	27.6	2.47654	5	0.49	1.39	0.0582	8	3.37262	10.7586
2230	42.9031	86.4948	3.6498	228	Nitraria tangutorum	woody plant	2.14	18.7	3.09377	5	-2.86	1.39	0.0582	8	3.37262	10.7586
2400	42.9137	86.5728	2.6298	236	Arundinella anomala	herb	-1.14	13.9	3.40419	3.19	-4.33	1.27	0.0932	8.36	2.2042	12.5088
2400	42.9137	86.5728	2.6298	236	Youngia tenuifolia	herb	1.25	22.2	2.91615	3.19	-1.94	1.27	0.0932	8.36	2.2042	12.5088
2400	42.9137	86.5728	2.6298	236	Stipa grandis	herb	-0.47	16.7	3.23554	3.19	-3.66	1.27	0.0932	8.36	2.2042	12.5088
2400	42.9137	86.5728	2.6298	236	Artemisia frigida	herb	0.23	21.4	2.8937	3.19	-2.96	1.27	0.0932	8.36	2.2042	12.5088
2400	42.9137	86.5728	2.6298	236	Oxytropis sp.	herb	-0.98	26.3	2.62104	3.19	-4.17	1.27	0.0932	8.36	2.2042	12.5088
2400	42.9137	86.5728	2.6298	236	Elaeagnus angustifolia	woody plant	4.39	29	2.52011	3.19	1.2	1.27	0.0932	8.36	2.2042	12.5088
2400	42.9137	86.5728	2.6298	236	Ephedra sinica	woody plant	0.56	12.3	3.47785	3.19	-2.63	1.27	0.0932	8.36	2.2042	12.5088
2400	42.9137	86.5728	2.6298	236	Nitraria tangutorum	woody plant	-3.43	30.1	2.6174	3.19	-6.62	1.27	0.0932	8.36	2.2042	12.5088
2550	42.905	86.6425	1.7298	242	Roegneria kamoji	herb	1.87	25	2.69192	5.17	-3.3	0.86	0.2314	7.93	5.16861	11.2984
2550	42.905	86.6425	1.7298	242	Stipa grandis	herb	1.42	28.2	2.65535	5.17	-3.75	0.86	0.2314	7.93	5.16861	11.2984
2550	42.905	86.6425	1.7298	242	Agropyron cristatum	herb	1.67	23.9	2.84491	5.17	-3.5	0.86	0.2314	7.93	5.16861	11.2984
2550	42.905	86.6425	1.7298	242	Artemisia frigida	herb	5.16	30.4	2.584	5.17	-0.01	0.86	0.2314	7.93	5.16861	11.2984
2550	42.905	86.6425	1.7298	242	Lagochilus sp.	herb	2.04	33.2	2.5096	5.17	-3.13	0.86	0.2314	7.93	5.16861	11.2984
2860	42.9838	86.7074	-0.1302	258	Potentilla sp.	herb	4.83	29.6	2.52172	6.84	-2.01	1.11	0.2851	7.8	4.29238	12.9763
2860	42.9838	86.7074	-0.1302	258	Agropyron cristatum	herb	4.1	38.3	2.32043	6.84	-2.74	1.11	0.2851	7.8	4.29238	12.9763
2860	42.9838	86.7074	-0.1302	258	Artemisia sp.	herb	3.36	18.7	3.07084	6.84	-3.48	1.11	0.2851	7.8	4.29238	12.9763
2860	42.9838	86.7074	-0.1302	258	unknown	herb	2.51	14.9	3.18883	6.84	-4.33	1.11	0.2851	7.8	4.29238	12.9763
2860	42.9838	86.7074	-0.1302	258	Artemisia frigida	herb	2.69	17.8	2.93013	6.84	-4.15	1.11	0.2851	7.8	4.29238	12.9763
2860	42.9838	86.7074	-0.1302	258	Potentilla sp.	herb	-1.86	26.1	2.59301	6.84	-8.7	1.11	0.2851	7.8	4.29238	12.9763
2860	42.9838	86.7074	-0.1302	258	Potentilla chinensis	herb	-1.63	28.9	2.42303	6.84	-8.47	1.11	0.2851	7.8	4.29238	12.9763
3030	43.0065	86.7332	-1.1502	266	Leontopodium sp.	herb	-4.46	7.2	3.45347	8.63	-13.09	1.41	0.129	8.04	2.5121	12.4444
3030	43.0065	86.7332	-1.1502	266	Hierochloe sp.	herb	3.24	16.4	3.08694	8.63	-5.39	1.41	0.129	8.04	2.5121	12.4444
3030	43.0065	86.7332	-1.1502	266	unknown	herb	4.68	24.5		8.63	-3.95	1.41	0.129	8.04	2.5121	12.4444
3030	43.0065	86.7332	-1.1502	266	Artemisia frigida	herb	5.28	23.6	2.59301	8.63	-3.35	1.41	0.129	8.04	2.5121	12.4444
3030	43.0065	86.7332	-1.1502	266	unknown	herb	3.15	15	3.18428	8.63	-5.48	1.41	0.129	8.04	2.5121	12.4444
3030	43.0065	86.7332	-1.1502	266	unknown	herb	5.38	13.4	2.74406	8.63	-3.25	1.41	0.129	8.04	2.5121	12.4444
3190	43.023	86.75	-2.1102	284	Hieracium umbellatum	herb	2.03	14.4	3.2527	4.02	-1.99	1.02	0.346	8.14	3.5117	12.9509
3190	43.023	86.75	-2.1102	284	unknown	herb	-2.18	20.2	3.02917	4.02	-6.2	1.02	0.346	8.14	3.5117	12.9509
3190	43.023	86.75	-2.1102	284	unknown	herb	0.27	43.5	2.25654	4.02	-3.75	1.02	0.346	8.14	3.5117	12.9509
3190	43.023	86.75	-2.1102	284	Polygonum sp.	herb	1.59	19.1	3.02189	4.02	-2.43	1.02	0.346	8.14	3.5117	12.9509
3190	43.023	86.75	-2.1102	284	unknown	herb	5.34	19.3		4.02	1.32	1.02	0.346	8.14	3.5117	12.9509
3190	43.023	86.75	-2.1102	284	unknown	herb	3.34	11.3	3.49226	4.02	-0.68	1.02	0.346	8.14	3.5117	12.9509
3190	43.023	86.75	-2.1102	284	unknown	herb	2.38	23.1	2.57032	4.02	-1.64	1.02	0.346	8.14	3.5117	12.9509
3290	43.0416	86.7886	-2.7102	282	unknown	herb	0.25	20.9	2.96373	4.08	-3.83	0.69	0.6372	7.72	6.62637	18.521
3290	43.0416	86.7886	-2.7102	282	Artemisia sp.	herb	-1.38	16.8	3.07362	4.08	-5.46	0.69	0.6372	7.72	6.62637	18.521
3290	43.0416	86.7886	-2.7102	282	unknown	herb	1.05	26	2.69733	4.08	-3.03	0.69	0.6372	7.72	6.62637	18.521
3290	43.0416	86.7886	-2.7102	282	Oxytropis sp.	herb	0.88	42.8	2.16791	4.08	-3.2	0.69	0.6372	7.72	6.62637	18.521
3290	43.0416	86.7886	-2.7102	282	Polygonum sp.	herb	4.12	34.1	2.40964	4.08	0.04	0.69	0.6372	7.72	6.62637	18.521
3290	43.0416	86.7886	-2.7102	282	Thermopsis lanceolata	herb	2.59	31.8	2.55334	4.08	-1.49	0.69	0.6372	7.72	6.62637	18.521
3290	43.0416	86.7886	-2.7102	282	Elymus dahuricus	herb	1.93	29.2	2.66584	4.08	-2.15	0.69	0.6372	7.72	6.62637	18.521
3290	43.0416	86.7886	-2.7102	282	unknown	herb	5.52	15.5	2.97757	4.08	1.44	0.69	0.6372	7.72	6.62637	18.521
3410	43.0781	86.7906	-3.4302	294	Anaphalis lactea	herb	-1.13	13.8	3.22645	0.47	-1.6	0.94	0.6278	7.68	3.62939	13.3702
3410	43.0781	86.7906	-3.4302	294	Helictotrichon schellianum	herb	-0.21	9.6	3.48278	0.47	-0.68	0.94	0.6278	7.68	3.62939	13.3702
3410	43.0781	86.7906	-3.4302	294	unknown	herb	0.87	17	2.94339	0.47	0.4	0.94	0.6278	7.68	3.62939	13.3702
3410	43.0781	86.7906	-3.4302	294	Inula sp.	herb	1.24	20.9	2.8285	0.47	0.77	0.94	0.6278	7.68	3.62939	13.3702
3410	43.0781	86.7906	-3.4302	294	unknown	herb	2.62	31.3	2.45531	0.47	2.15	0.94	0.6278	7.68	3.62939	13.3702
3410	43.0781	86.7906	-3.4302	294	unknown	herb	3.31	31.5	2.53211	0.47	2.84	0.94	0.6278	7.68	3.62939	13.3702
3410	43.0781	86.7906	-3.4302	294	Papaver nudicaule	herb	2.66	17.5	2.85762	0.47	2.19	0.94	0.6278	7.68	3.62939	13.3702
3410	43.0781	86.7906	-3.4302	294	unknown	herb	2.44	28.8	2.56649	0.47	1.97	0.94	0.6278	7.68	3.62939	13.3702
3410	43.0781	86.7906	-3.4302	294	Echinochloa sp.	herb	1.59	26.1	2.69124	0.47	1.12	0.94	0.6278	7.68	3.62939	13.3702
3560	43.0754	86.8067	-4.3302	311	unknown	herb	1.41	17.3	3.0573	4.95	-3.54	1.55	0.253	7.71	2.71442	15.8687
3560	43.0754	86.8067	-4.3302	311	Kobresia humilis	herb	1.17	31.9	2.57718	4.95	-3.78	1.55	0.253	7.71	2.71442	15.8687
3560	43.0754	86.8067	-4.3302	311	unknown	herb	1.33	14.7	3.12676	4.95	-3.62	1.55	0.253	7.71	2.71442	15.8687
3560	43.0754	86.8067	-4.3302	311	Inula sp.	herb	1.77	25.5	2.62612	4.95	-3.18	1.55	0.253	7.71	2.71442	15.8687
3660	43.0806	86.8095	-4.9302	297	Anaphalis lactea	herb	-0.96	23.5	2.74213	4.48	-5.44	0.61	0.8793	6.99	7.06836	16.7548
3660	43.0806	86.8095	-4.9302	297	Kobresia humilis	herb	0.42	33.4	2.52653	4.48	-4.06	0.61	0.8793	6.99	7.06836	16.7548
3660	43.0806	86.8095	-4.9302	297	unknown	herb	1.08	30.6	2.62684	4.48	-3.4	0.61	0.8793	6.99	7.06836	16.7548
3660	43.0806	86.8095	-4.9302	297	unknown	herb	2.33	28	2.63763	4.48	-2.15	0.61	0.8793	6.99	7.06836	16.7548
3660	43.0806	86.8095	-4.9302	297	Leptochloa fusca	herb	-1	3		4.48	-5.48	0.61	0.8793	6.99	7.06836	16.7548
3780	43.0949	86.8128	-5.6502	308	Kobresia humilis	herb	5.29	13.5	3.2312	4.27	1.02	0.78	0.828	6.68	4.4037	25.5196
3780	43.0949	86.8128	-5.6502	308	unknown	herb	-0.42	14.9	3.20518	4.27	-4.69	0.78	0.828	6.68	4.4037	25.5196
3780	43.0949	86.8128	-5.6502	308	unknown	herb	0.46	23.2	2.85071	4.27	-3.81	0.78	0.828	6.68	4.4037	25.5196
3780	43.0949	86.8128	-5.6502	308	Cyperaceae	herb	0.43	6.3	3.1394	4.27	-3.84	0.78	0.828	6.68	4.4037	25.5196
3780	43.0949	86.8128	-5.6502	308	Potentilla sp.	herb	5.49	6.8	3.4356	4.27	1.22	0.78	0.828	6.68	4.4037	25.5196
